# Supplementary material
Source: PubMed Central journal article supplement (PMC5010995)
Supplement: NIHMS805265-supplement-05.pdf [file NIHMS805265-supplement-05.pdf]

## Supplementary figure legends

**Supplementary Fig. 1.** Effect of low dose insulin on cerebral insulin receptor signaling pathway. Mice were injected with insulin at 2 U/kg. The protein levels of p-Akt (Thr308), Akt, p-p70S6K (Thr389), and P70S6K were analyzed by Western blotting in the whole brain lysates 20 min after insulin injection. **(A)** Representative Western blots of p-Akt (Thr308), Akt, p-p70S6K (Thr389), and P70S6K. **(B)** Quantification of the p-Akt (Thr308). **(C)** Quantification of the p-p70S6K (Thr389). Values were normalized to  $\beta$ -actin and were shown by the relative density (p-Akt/Akt and p-p70S6K/p70S6K). Values are means  $\pm$  SD,  $n = 4$ . \* $p < 0.05$  vs. control animals.

**Supplementary Fig. 2.** Effect of low dose insulin on HIF-1 $\alpha$  expression, BBB permeability, and brain infarction in diabetic mice. Diabetic mice were treated with a low dose of insulin (2 U/kg) at the onset of reperfusion. The protein levels of HIF-1 $\alpha$  were analyzed by Western blotting in cerebral microvessels lysates from contralateral and ipsilateral hemispheres of mice. **(A)** Representative Western blots of HIF-1 $\alpha$ . **(B)** Quantification of the HIF-1 $\alpha$  protein level in contralateral hemispheres (white bars) and ipsilateral hemispheres (dark bars) ( $n=5$  (diabetic), 3 (low dose insulin)). Values were normalized to  $\beta$ -actin and contralateral hemispheres of diabetic animals. \* $p < 0.05$  vs. contralateral brains of diabetic animals. **(C)** Quantification of EB leakage in contralateral and ipsilateral hemispheres ( $n=5$  (diabetic), 3 (low dose insulin)). White bars, contralateral hemisphere; dark bars, ipsilateral hemisphere. **(D)** Quantification of infarct volume estimated by TTC stained sections ( $n=8$  (diabetic), 3 (low dose insulin)). Values are means  $\pm$  SD.

**Supplementary Fig. 3.** Effect of glucose administration at reperfusion on HIF-1 $\alpha$  expression and BBB permeability. Mice were rendered hyperglycemia by receiving an initial 25% glucose injection (5 ml/kg, i.p.) at the onset of reperfusion. A booster dose of glucose (2 ml/kg, i.p.) was injected every 90 min after the first injection. At 6 h post-ischemia, the protein levels of HIF-1 $\alpha$  were analyzed by Western blotting in cerebral microvessel lysates. **(A)** Representative Western blots of HIF-1 $\alpha$ . HG: high glucose treated mice. **(B)** Quantification of the HIF-1 $\alpha$  protein level in contralateral hemispheres (white bars) and ipsilateral hemispheres (dark bars) ( $n=3$ ). Values were normalized to  $\beta$ -actin and contralateral hemispheres of control animals. \* $p < 0.05$  vs. contralateral brains of control animals. # $p < 0.05$  vs. ipsilateral brains of control animals. **(C)** Quantification of EB leakage in contralateral and

ipsilateral hemispheres at 6 h of reperfusion (n=3). White bars, contralateral hemisphere; dark bars, ipsilateral hemisphere. \* $p < 0.05$  vs. control animals. Values are means  $\pm$  SD.

**Supplementary Fig. 4.** Effect of high glucose on intracellular succinate level in hCMEC/D3 cells (a human cerebral microvascular endothelial cell line). Cells were incubated in normal glucose medium (5.5 mM) or high glucose medium (25 mM) for 3 days. **(A)**  $^1\text{H}$  NMR spectra of cell lysates. The arrow indicates the succinate peak. **(B)** Quantification of succinate concentration. Values were normalized to cell protein concentration. Values are means  $\pm$  SD, n = 3. \* $p < 0.05$  vs. control.
